# Supplementary material for: Screening and predicting progression from high-risk mild cognitive impairment to Alzheimer’s disease
Source: PubMed Central journal article supplement (PMC8413294; doi:10.1038/s41598-021-96914-3), 2021-09-02
Supplement: 41598_2021_96914_MOESM1_ESM.pdf [file 41598_2021_96914_MOESM1_ESM.pdf]

## Title Page

Screening and predicting progression from high-risk mild cognitive impairment to Alzheimer's disease

1.Xiao-Yan Ge<sup>1,2</sup>

<sup>1</sup>Department of Health Statistics, School of Public Health, Shanxi Medical University, 56 XinJian South Road, Taiyuan, China;

<sup>2</sup>Department of Health Statistics, School of Public Health, Jinzhou Medical University, 40 SongPo Road, Jinzhou, China.

2.Kai Cui

Department of Health Statistics, School of Public Health, Jinzhou Medical University, 40 SongPo Road, Jinzhou, China.

3.Long Liu

Department of Health Statistics, School of Public Health, Shanxi Medical University, 56 XinJian South Road, Taiyuan, China.

4. Yao Qin

Department of Health Statistics, School of Public Health, Shanxi Medical University, 56 XinJian South Road, Taiyuan, China.

5. Jing Cui

Department of Health Statistics, School of Public Health, Shanxi Medical University, 56 XinJian South Road, Taiyuan, China.

6. Hong-Juan Han

Department of Mathematics, School of Basic Medical Sciences, Shanxi Medical

University, Taiyuan, China.

7. Yan-Hong Luo

Department of Health Statistics, School of Public Health, Shanxi Medical University,  
56 XinJian South Road, Taiyuan, China.

8. Hong-Mei Yu<sup>1,2</sup>

<sup>1</sup>Department of Health Statistics, School of Public Health, Shanxi Medical  
University, 56 XinJian South Road, Taiyuan, China;

<sup>2</sup>Shanxi Provincial Key Laboratory of Major Diseases Risk Assessment, 56 XinJian  
South Road, Taiyuan, China.

Corresponding author: Prof. HongMei Yu, Department of Health Statistics,  
School of Public Health, Shanxi Medical University, 56 XinJian South Road,  
Taiyuan, China. Tel.: +86 351 4135049, E-mail: [yu@sxmu.edu.cn](mailto:yu@sxmu.edu.cn).

ORCID ID:[yu@sxmu.edu.cn](https://orcid.org/0009-0001-9000-0000)

Supplementary Table S1.

Hazard ratio (95%) of cox proportional hazards analysis based on ADAS-13 predictive dataset.

| Predictors                       | A1                  | A1+baseline MRI       | A2                    | A2+baseline MRI       | A2+ΔMRI               |
|----------------------------------|---------------------|-----------------------|-----------------------|-----------------------|-----------------------|
| Age                              | 0.96 [0.93, 1.00]   | 0.95 [0.91, 0.99] *   | 0.96 [0.92, 1.00] *   | 0.95 [0.91, 1.00] *   | 0.92 [0.86, 0.98] *   |
| Gender                           | 1.20 [0.69, 2.08]   | 1.47 [0.65, 3.33]     | 0.86 [0.46, 1.59]     | 1.19 [0.49, 2.90]     | 0.68 [0.31, 1.49]     |
| Marital status=2                 | 0.45 [0.15, 1.34]   | 0.19 [0.05, 0.71] *   | △                     | 0.28 [0.07, 1.11]     | 0.24 [0.04, 1.34]     |
| Marital status=3                 | 0.82 [0.37, 1.83]   | 0.93 [0.42, 2.08]     | △                     | 1.09 [0.47, 2.68]     | 2.39 [0.68, 8.40]     |
| ApoEε4                           | 1.14 [0.66, 1.97]   | 1.69 [0.95, 3.00]     | 1.19 [0.67, 2.14]     | 1.19 [0.62, 2.29]     | 1.29 [0.60, 2.79]     |
| ADAS-13_bl                       | 1.06 [1.00, 1.12] * | 1.14 [1.07, 1.21] *** | 1.09 [1.02, 1.16] **  | 1.14 [1.06, 1.23] *** | 1.13 [1.03, 1.24] **  |
| MMSE_bl                          | 0.89 [0.77, 1.04]   | 0.84 [0.71, 0.99] *   | 0.91 [0.76, 1.11]     | 0.88 [0.73, 1.07]     | 0.80 [0.62, 1.02]     |
| CDRSB_bl                         | -                   | 1.56 [1.23, 1.97] *** | 2.05 [1.53, 2.72] *** | 2.06 [1.53, 2.77] *** | 1.70 [1.20, 2.40] **  |
| CDRSB_bl1                        | △                   | -                     | -                     | -                     | -                     |
| Hippocampus_bl(cm <sup>3</sup> ) | -                   | 0.83 [0.54, 1.28]     | -                     | 0.80 [0.52, 1.22]     | -                     |
| WholeBrain_bl(cm <sup>3</sup> )  | -                   | 1.00 [0.99, 1.01]     | -                     | 1.00 [0.99, 1.01]     | -                     |
| Entorhinal_bl(cm <sup>3</sup> )  | -                   | 0.90 [0.53, 1.51]     | -                     | 1.30 [0.75, 2.27]     | -                     |
| ΔADAS-13                         | -                   | -                     | 1.09 [1.03, 1.17] **  | 1.09 [1.00, 1.18] *   | 1.01 [0.91, 1.11]     |
| ΔMMSE                            | -                   | -                     | 0.95 [0.80, 1.12]     | 1.00 [0.84, 1.18]     | 0.81 [0.63, 1.03]     |
| ΔCDRSB                           | -                   | -                     | 2.08 [1.59, 2.72] *** | 2.08 [1.54, 2.80] *** | 2.41 [1.62, 3.58] *** |
| ΔHippocampus (cm <sup>3</sup> )  | -                   | -                     | -                     | -                     | 1.91 [0.27, 13.4]     |
| ΔWholeBrain (cm <sup>3</sup> )   | -                   | -                     | -                     | -                     | 0.95 [0.91, 0.99] *   |
| ΔEntorhinal(cm <sup>3</sup> )    | -                   | -                     | -                     | -                     | 0.17 [0.04, 0.85] *   |

Notes. A1: ADAS-13 baseline Prognosis Model; A2: ADAS-13 longitudinal Prognosis Model; M1: MMSE baseline Prognosis Model; M2: MMSE longitudinal Prognosis Model. ADAS-13\_bl, Alzheimer Disease Assessment Scale Cognitive 13 items at Baseline; MMSE\_bl, Mini mental state examination at Baseline; CDRSB\_bl, Clinical Dementia Rating Sum of Boxes at Baseline; ΔADAS-13, (ADAS-13\_M12 – ADAS-13\_bl) /1 year; ΔMMSE, (MMSE\_M12 – MMSE\_bl)

/1 year;  $\Delta$ CDRSB, (CDRSB\_M12 – CDRSB\_bl) /1 year; Hippocampus\_bl, The Total Volumes of The Hippocampus at Baseline; WholeBrain\_bl, Whole Brain at Baseline; Entorhinal\_bl, Entorhinal Cortex at Baseline;  $\Delta$ Hippocampus, (Hippocampus\_M12 – Hippocampus\_bl) /1 year;  $\Delta$ WholeBrain, (WholeBrain\_M12 – WholeBrain\_bl) /1 year;  $\Delta$ Entorhinal, (Entorhinal\_M12 – Entorhinal\_bl) /1 year.  $\Delta$ : stratified variable. *p-value*: \*\*\*:  $P < 0.001$ ; \*\*:  $P < 0.01$ ; \*:  $P < 0.05$ .

Supplementary Table S2.

Hazard ratio (95%) of cox proportional hazards analysis based on MMSE predictive dataset.

| Variables                               | M1                   | M1+baseline MRI       | M2                    | M2+baseline MRI       | M2+ $\Delta$ MRI      |
|-----------------------------------------|----------------------|-----------------------|-----------------------|-----------------------|-----------------------|
| Age                                     | 0.96 [0.92, 1.00]    | 0.93 [0.88, 0.98] **  | 0.96 [0.92, 1.01]     | 0.94 [0.88, 0.99] *   | 0.93 [0.86, 1.01]     |
| Gender                                  | 0.90 [0.49, 1.67]    | 0.67 [0.26, 1.71]     | 0.97 [0.48, 1.93]     | 0.72 [0.28, 1.89]     | 0.55 [0.23, 1.34]     |
| Marital status=2                        | 0.80 [0.25, 2.50]    | 0.40 [0.10, 1.55]     | 0.61 [0.18, 2.02]     | 0.34 [0.08, 1.39]     | 0.21 [0.03, 1.30]     |
| Marital status=3                        | 1.13 [0.42, 3.03]    | 2.16 [0.77, 6.07]     | 0.72 [0.25, 2.06]     | 1.58 [0.53, 4.71]     | 1.33 [0.28, 6.30]     |
| ApoE $\epsilon$ 4                       | 0.97 [0.53, 1.78]    | 1.44 [0.76, 2.70]     | 1.01 [0.53, 1.92]     | 1.10 [0.54, 2.21]     | 0.99 [0.36, 2.70]     |
| ADAS-13_bl                              | 1.07 [1.02, 1.13] ** | 1.14 [1.07, 1.21] *** | 1.10 [1.04, 1.17] **  | 1.16 [1.08, 1.24] *** | 1.19 [1.07, 1.32] **  |
| MMSE_bl                                 | 1.06 [0.89, 1.28]    | 0.94 [0.77, 1.16]     | 1.00 [0.80, 1.23]     | 1.00 [0.79, 1.26]     | 0.88 [0.65, 1.19]     |
| CDRSB_bl                                | -                    | 1.88 [1.39, 2.53] *** | -                     | 2.07 [1.49, 2.89] *** | 2.03 [1.33, 3.09] *** |
| CDRSB_bl1                               | $\Delta$             | -                     | $\Delta$              | -                     | -                     |
| Hippocampus_bl(cm <sup>3</sup> )        | -                    | 0.82 [0.54, 1.24]     | -                     | 0.83 [0.53, 1.29]     | -                     |
| WholeBrain_bl(cm <sup>3</sup> )         | -                    | 1.00 [0.99, 1.01]     | -                     | 1.00 [0.99, 1.01]     | -                     |
| Entorhinal_bl(cm <sup>3</sup> )         | -                    | 0.87 [0.51, 1.49]     | -                     | 0.98 [0.56, 1.70]     | -                     |
| $\Delta$ ADAS-13                        | -                    | -                     | 0.97 [0.79, 1.18] **  | 1.09 [1.00, 1.18] *   | 1.06 [0.96, 1.17]     |
| $\Delta$ MMSE                           | -                    | -                     | 1.10 [1.03, 1.17]     | 1.14 [0.92, 1.41]     | 1.11 [0.82, 1.48]     |
| $\Delta$ CDRSB                          | -                    | -                     | 1.66 [1.25, 2.21] *** | 1.79 [1.30, 2.47] *** | 2.26 [1.42, 3.60] *** |
| $\Delta$ Hippocampus (cm <sup>3</sup> ) | -                    | -                     | -                     | -                     | 1.43 [0.17, 12.0]     |
| $\Delta$ WholeBrain (cm <sup>3</sup> )  | -                    | -                     | -                     | -                     | 0.97 [0.92, 1.01]     |
| $\Delta$ Entorhinal(cm <sup>3</sup> )   | -                    | -                     | -                     | -                     | 0.29 [0.06, 1.47]     |

Notes. A1: ADAS-13 baseline Prognosis Model; A2: ADAS-13 longitudinal Prognosis Model; M1: MMSE baseline Prognosis Model; M2: MMSE longitudinal Prognosis Model. ADAS-13\_bl, Alzheimer Disease Assessment Scale Cognitive 13 items at Baseline; MMSE\_bl, Mini mental state examination at Baseline; CDRSB\_bl, Clinical Dementia Rating Sum of Boxes at Baseline;  $\Delta$ ADAS-13, (ADAS-13\_M12 – ADAS-13\_bl) /1 year;  $\Delta$ MMSE, (MMSE\_M12 – MMSE\_bl)

/1 year;  $\Delta$ CDRSB, (CDRSB\_M12 – CDRSB\_bl) /1 year; Hippocampus\_bl, The Total Volumes of The Hippocampus at Baseline; WholeBrain\_bl, Whole Brain at Baseline; Entorhinal\_bl, Entorhinal Cortex at Baseline;  $\Delta$ Hippocampus, (Hippocampus\_M12 – Hippocampus\_bl) /1 year;  $\Delta$ WholeBrain, (WholeBrain\_M12 – WholeBrain\_bl) /1 year;  $\Delta$ Entorhinal, (Entorhinal\_M12 – Entorhinal\_bl) /1 year.  $\Delta$ : stratified variable. *p-value*: \*\*\*:  $P < 0.001$ ; \*\*:  $P < 0.01$ ; \*:  $P < 0.05$ .

Supplementary Table S3.

The performance of ADAS-13 and MMSE prognosis models validated by bootstrap, as indicated by Optimism-corrected concordance index (Optimism-corrected C-index) (B=500).

| Model            | Apparent | Bootstrap | Test  | Optimism | Optimism.<br>corrected | Optimism-corrected<br>concordance index |
|------------------|----------|-----------|-------|----------|------------------------|-----------------------------------------|
| A1               | 0.484    | 0.507     | 0.403 | 0.104    | 0.380                  | 0.690                                   |
| A1+baseline MRI  | 0.556    | 0.617     | 0.509 | 0.108    | 0.448                  | 0.724                                   |
| A2               | 0.650    | 0.689     | 0.618 | 0.071    | 0.579                  | 0.790                                   |
| A2+baseline MRI  | 0.701    | 0.621     | 0.544 | 0.078    | 0.623                  | 0.812                                   |
| A2+ $\Delta$ MRI | 0.772    | 0.799     | 0.686 | 0.113    | 0.659                  | 0.830                                   |
| M1               | 0.503    | 0.528     | 0.425 | 0.103    | 0.400                  | 0.700                                   |
| M1+baseline MRI  | 0.590    | 0.663     | 0.554 | 0.109    | 0.481                  | 0.741                                   |
| M2               | 0.602    | 0.652     | 0.549 | 0.102    | 0.500                  | 0.750                                   |
| M2+baseline MRI  | 0.704    | 0.677     | 0.578 | 0.100    | 0.604                  | 0.802                                   |
| M2+ $\Delta$ MRI | 0.725    | 0.748     | 0.606 | 0.142    | 0.583                  | 0.792                                   |

*Notes.* A1: ADAS-13 baseline Prognosis Model; A2: ADAS-13 longitudinal Prognosis Model; M1: MMSE baseline Prognosis Model; M2: MMSE longitudinal Prognosis Model.
